# Supplementary material
Source: PubMed Central journal article supplement (PMC11077306)

Supplementary Material

Supplementary Table 1. Number of lung cancer deaths by baseline calendar period and smoking status.

| <b>Calendar period</b> | <b>Smoking Status</b> | <b>Lung cancer deaths</b> |
|------------------------|-----------------------|---------------------------|
| 1991-1993              | Never                 | 45                        |
|                        | Former                | 210                       |
|                        | Current               | 338                       |
| 1994-1995              | Never                 | 23                        |
|                        | Former                | 90                        |
|                        | Current               | 159                       |
| 1997-1999              | Never                 | 58                        |
|                        | Former                | 227                       |
|                        | Current               | 358                       |
| 2000-2002              | Never                 | 50                        |
|                        | Former                | 193                       |
|                        | Current               | 286                       |
| 2003-2005              | Never                 | 42                        |
|                        | Former                | 168                       |
|                        | Current               | 266                       |
| 2006-2008              | Never                 | 52                        |
|                        | Former                | 111                       |
|                        | Current               | 160                       |
| 2009-2011              | Never                 | 30                        |
|                        | Former                | 106                       |
|                        | Current               | 117                       |
| 2012-2014              | Never                 | 19                        |
|                        | Former                | 52                        |
|                        | Current               | 61                        |

Supplementary Table 2. Estimated number of smoking-attributable and smoking-unrelated lung cancer deaths in the U.S., 1991-2018.

| Year | Lung Cancer Deaths   |                   |
|------|----------------------|-------------------|
|      | Smoking-attributable | Smoking-unrelated |
| 1991 | 96,897               | 25,257            |
| 1992 | 97,914               | 25,496            |
| 1993 | 98,226               | 26,607            |
| 1994 | 98,378               | 26,076            |
| 1995 | 98,324               | 26,420            |
| 1996 | 98,001               | 26,475            |
| 1997 | 98,027               | 26,481            |
| 1998 | 98,288               | 26,779            |
| 1999 | 95,285               | 26,757            |
| 2000 | 96,869               | 27,246            |
| 2001 | 96,450               | 27,233            |
| 2002 | 96,418               | 27,469            |
| 2003 | 95,527               | 27,823            |
| 2004 | 94,595               | 28,105            |
| 2005 | 93,893               | 28,492            |
| 2006 | 93,391               | 27,621            |
| 2007 | 92,202               | 28,200            |
| 2008 | 91,825               | 27,377            |
| 2009 | 91,409               | 27,287            |
| 2010 | 90,339               | 27,700            |
| 2011 | 89,296               | 27,719            |
| 2012 | 88,985               | 28,415            |
| 2013 | 88,273               | 28,129            |
| 2014 | 87,288               | 28,996            |
| 2015 | 85,657               | 29,029            |
| 2016 | 83,204               | 27,363            |
| 2017 | 80,492               | 27,814            |
| 2018 | 78,450               | 26,798            |

Supplementary Figure 1. Hazard ratios for lung cancer mortality in never smokers compared to ever smokers by National Health Interview Survey baseline survey year, 1991-2014.

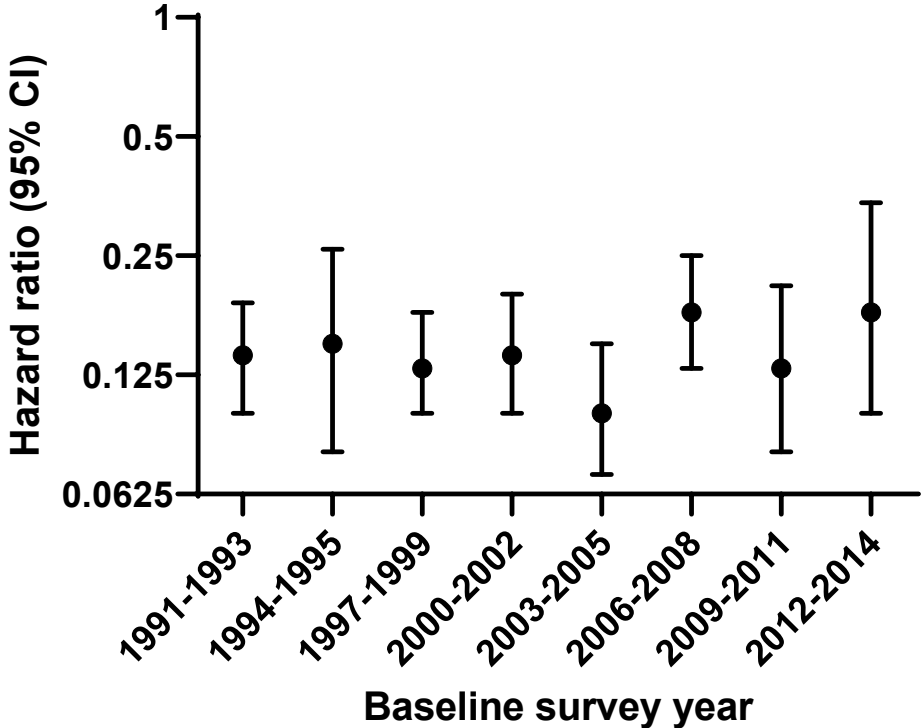

Supplement: djad256_supplementary_data.pdf [file djad256_supplementary_data.pdf]
